# Supplementary material
Source: publisher figshare collection journal article supplement (https://frontiersin.figshare.com/ndownloader/files/35471030)
Supplement: Supplementary file [file 35471030]

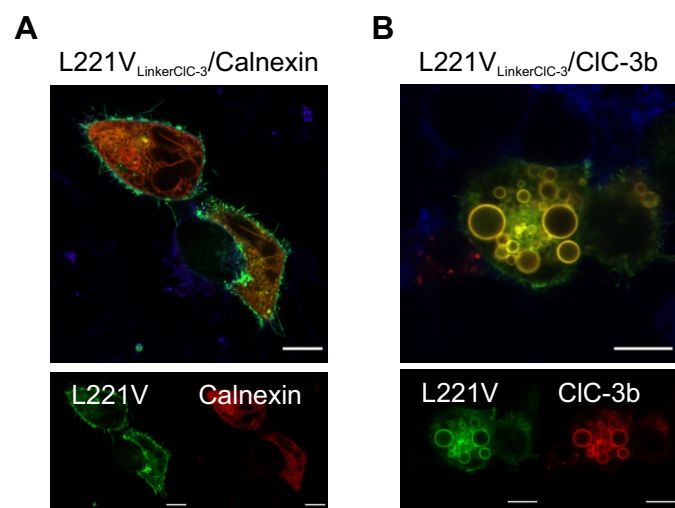

**Supplementary Fig. 4**

**Supplementary Figure 4. Subcellular distribution of the L221V ClC-4 chimeric protein.** (A,B) Confocal images of HEK293T cells expressing the chimeric mutant L221V<sub>LinkerClC-3</sub> alone show extensive plasma membrane localization (A) and (B) overlapping with ClC-3b in co-transfected cells. Confocal experiments were performed in triplicate. Scale bar represents 10  $\mu$ m.
